# Supplementary material for: Strong metal–support bonding enhanced thermal stability in Au–Al2O3 core–shell nanowires characterized by in situ transmission electron microscopy
Source: Royal Society of Chemistry journal article supplement (doi:10.1039/d3cc01996a), 2023-01-01
Supplement: d3cc01996a1.pdf [file d3cc01996a1.pdf]

# Strong Metal-Support Bonding Enhanced Thermal Stability in Au-Al<sub>2</sub>O<sub>3</sub> Core-Shell Nanowires Characterized by *in situ* Transmission Electron Microscopy

Haotian Yang,<sup>†a</sup> Claron J. Ridge,<sup>b</sup> Kyle Overdeep,<sup>b</sup> C. Michael Lindsay,<sup>b</sup> Xiao Tong,<sup>c</sup> and Alexander Orlov\*<sup>a</sup>

<sup>a</sup>Department of Material Science and Engineering, Stony Brook University, Stony Brook, New York 11794, United States

<sup>b</sup>Energetic Materials Branch, US Air Force Research Laboratory, Eglin Air Force Base, Florida 32542, United States

<sup>c</sup>Center for Functional Nanomaterials, Brookhaven National Laboratory, Upton, New York 11793, United States

### **Deposition conditions of nanowires by He nanodroplet method.**

Helium droplets were generated by supersonic expansion of He gas (99.9999%, chromatographic grade, Airgas Inc.) through a Pt nozzle (6.4  $\mu\text{m}$  in diameter) with a stagnation pressure of 20 bar into a vacuum chamber with a base pressure of  $2.9 \times 10^{-8}$  torr. The nozzle was cooled via a closed cycle He compressor down to 4.5 K. A 0.05 cm skimmer, located at 1.7 cm in front of the nozzle, produced a diverging beam of helium droplets. After the skimmer, the beam was directed through a vacuum chamber with a base pressure of  $8.6 \times 10^{-9}$  Torr and equipped with up to three effusive ovens. At 4.5 K and 20 bar, helium droplets each containing  $\sim 2 \times 10^{10}$  He atoms were produced and traveled above effusive ovens loaded with Al and Au that were heated at 1375 and 1575°C, respectively. The Al and Au atoms condensed into NWs within the He droplets and were carried to the TEM grids with  $\text{Si}_3\text{N}_4$  windows and  $\text{Si}_3\text{N}_4/\text{Si}$  where the He droplets evaporated, leaving behind the nanowires.

### **TEM/STEM Characterization**

TEM images were collected at 200 kV using JEOL JEM2100F. *In situ* scanning transmission electron microscopy (STEM) and EDS maps were acquired by FEI Talos F200X at 200 kV with an extra-bright electron source and a four-quadrant EDS detector.

### **XPS Characterization**

X-ray photoelectron spectroscopy (XPS) spectra were obtained by a Kratos Axis Ultra DLD spectrometer with nonmonochromatic Al  $K\alpha$  radiation (1486.6 eV) at pass energy of 20. The anode voltage and emission current of X-ray gun were 12 kV and 20 mA, respectively.

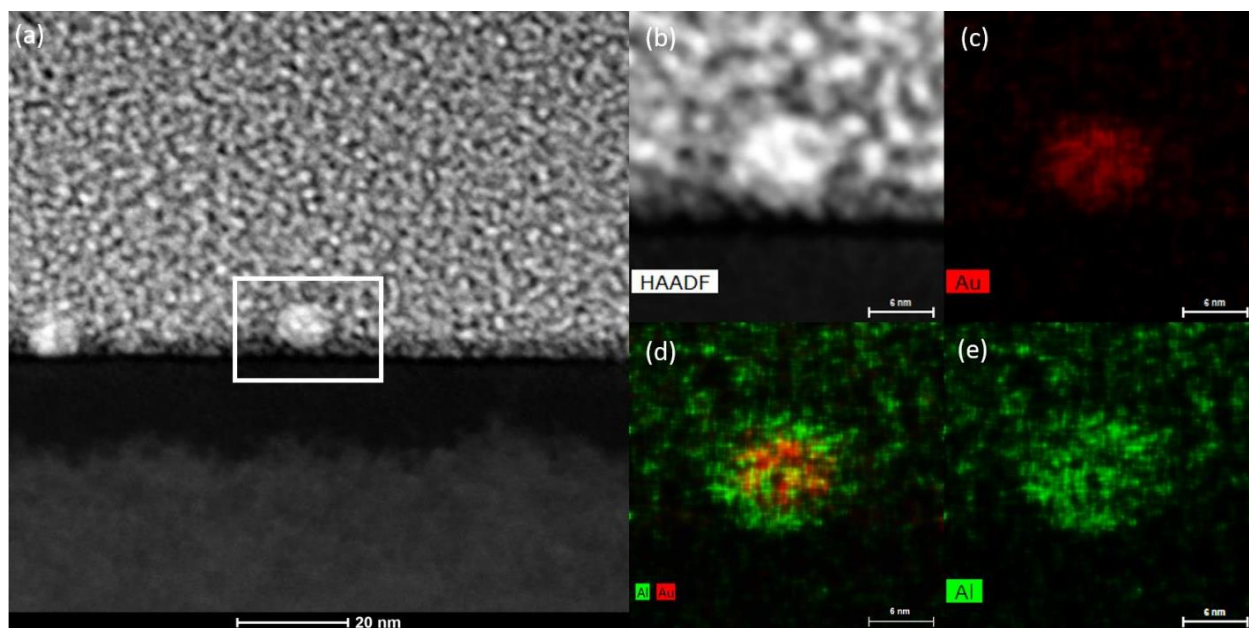

Figure S1. (a): STEM image of a single Au-Al<sub>2</sub>O<sub>3</sub> nanowire (cross section view). (b): EDS scanned area highlighted in (a) highlighted by white rectangular. (c) – (e): EDS maps of Au, Au-Al combined and Al signals. Additional FIB and STEM experiments will be conducted to acquire HAADF image of Au with crystal lattice pattern in the future.

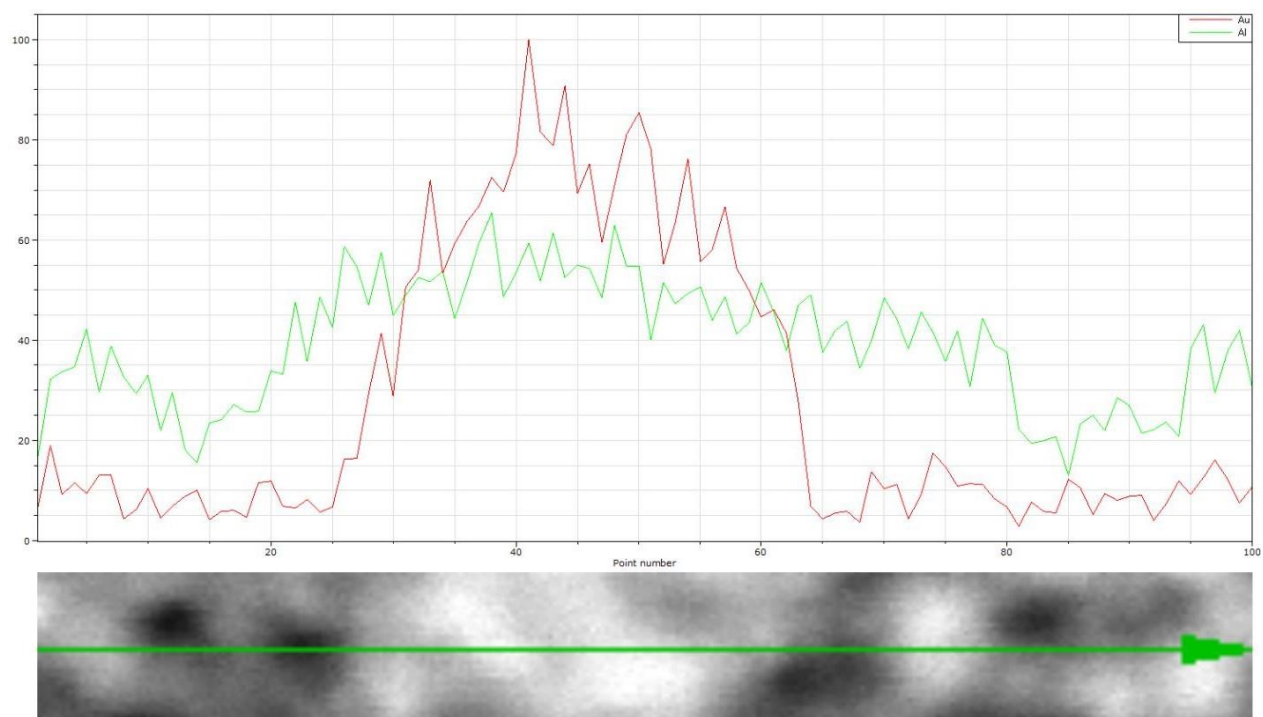

Figure S2. EDS line scan results of nanowire in Figure S1. Au signals (red) were surrounded by Al signals (green), which confirmed the core-shell structure of Au-Al<sub>2</sub>O<sub>3</sub> nanowire. The scanned direction is highlighted by the green line in the image under data graph.

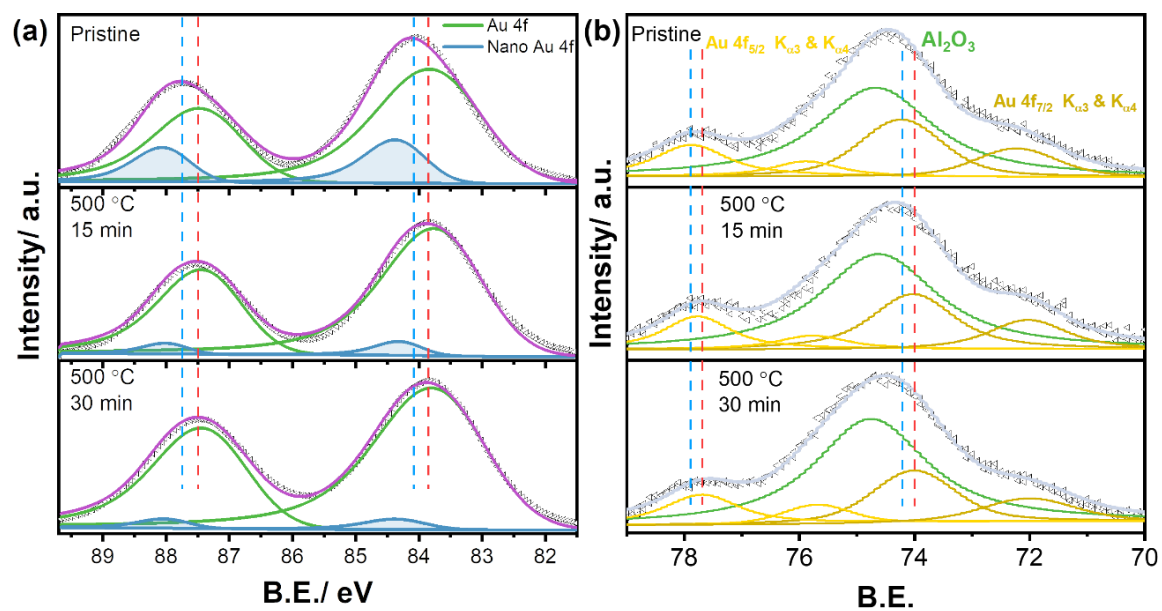

Figure S3. *In situ* XPS heating results of Au and Au-Al<sub>2</sub>O<sub>3</sub> nanowires. (a): XPS peaks of Au element. (b): XPS peaks of Al element and Au satellites.
